# Supplementary material for: Comparative Genomics of Enterococci: Variation in Enterococcus faecalis, Clade Structure in E. faecium, and Defining Characteristics of E. gallinarum and E. casseliflavus
Source: PubMed Central journal article supplement — mBio. 2012 Feb 21;3(1):e00318-11. doi: 10.1128/mBio.00318-11 (PMC3374389; doi:10.1128/mbio.00318-11), 2012-02-21
Supplement: mbo001121233sf02.pdf [file mbo001121233sf02.pdf]

CrtM

```

CrtM_Saureus_Newman      1  - - - - -MTMMDMNFKYCHKIMKKHKSFSYAFDLPEDORKAVWAIYAVCRKIDDSIDVYGDIOFLNQIKEDIQSIEKYPYEHFHQS- - - - -DR 84
EGBG_00588_Egall_EG2    1  MINKESTLFERYKEDFAYCEQIIKKHSKSFYSAFSQLPEKARSVFAVYAFCRQADDAIDRYQDIVKLNELHGLROMA- - -CGKVLDP- - - - - 87
ECAG_00586_Ecass_EC10  1  MTVKSLSVFDEYDNDFLYCEAIIKKHSKNFHTAFSQLPKDKSRAVYAVYAFCRRADDAVDEQKDPLLIEAMKKRLEEMQKQVSDDTIDLPQAVKEEDPDE 100
ECBG_00592_Ecass_EC20  1  MTVKSLSVFDEYDNDFLYCEAIIKKHSKNFHTAFSQLPKDKSRAVYAVYAFCRRADDAVDEQKDPLLIEAMKKRLEEMQKQVSDDAIDLPQAVKEEDPDE 100
EGAG_00576_Ecass_EC30  1  MTVKSLSVFDEYDNDFLYCEAIIKKHSKNFHTAFSQLPKDKSRAVYAVYAFCRRADDAVDEQKDPLLIEAMKKRLEEMQKQVSDDTIDLPQAVKEEDPDE 100

CrtM_Saureus_Newman      85  RIMMALQHVAQHKNIAFQSYFNLIDTVYKDQHFTMFETDAELFGYCYGVAGTVGEVLTPILSDHETHQTYDVARLGESLQLINILRDVGEDFDNERIYF 184
EGBG_00588_Egall_EG2    88  -LWRALSVVFAKYDLQFQPFYDMLAGQRMDLNFQPPETEADLSSYSYFVAGSVGLMLLPILS-QAAAIQKPAIKLGEAMQRTNILRDIGEDLAMNRIYL 185
ECAG_00586_Ecass_EC10  101 AIWRALTLSFQFDLQFQPFFDLLVGQKQDLDFQPTSEKELSDYSYVAGSVGLMLLPILS-QAAAIQKPAIKLGEAMQRTNILRDIGEDLRMGRIYL 199
ECBG_00592_Ecass_EC20  101 AIWRALTLSFQFDLQFQPFFDLLVGQKQDLDFQPTSEKELSDYSYVAGSVGLMLLPILS-QAAAIQKPAIKLGEAMQRTNILRDIGEDLRMGRIYL 199
EGAG_00576_Ecass_EC30  101 AIWRALTLSFQFDLQFQPFFDLLVGQKQDLDFQPTSEKELSDYSYVAGSVGLMLLPILS-QAAAIQKPAIKLGEAMQRTNILRDIGEDLRMGRIYL 199

CrtM_Saureus_Newman      185  SKQRLKQYEVDIAEVYQNGVNNHYIDLWEYAAIAEKDQDVMDQIKVFSIEAQPITELAARTYIEILDVRQANY-TLHERVFVDKRKAKLFHEINSK 283
EGBG_00588_Egall_EG2    186  PKETMORFEITIQHLRQKVTESFIQLWEFEALLEKLYDEALSMMPQIDEDCQEALMAALLIYRELLTVIREKNYQVFLKKNAVSIQRKALLLRSVKQQ 285
ECAG_00586_Ecass_EC10  200  PQTVLAQYNLSREALAAGNQNPQFIEMWEEAQLAETLYQESFVMPQIDEDCEALLAAALIYREILTVIRKNNYQVFAEKTAVPKQRIQLLFTAKKM 299
ECBG_00592_Ecass_EC20  200  PQTVLAQYNLSREALAAGNQNPQFIEMWEEAQLAETLYQESFVMPQIDEDCEALLAAALIYREILTVIRKNNYQVFAEKTAVPKQRIQLLFTAKKM 299
EGAG_00576_Ecass_EC30  200  PQTVLAQYNLSREALAAGNQNPQFIEMWEEAQLAETLYQESFVMPQIDEDCEALLAAALIYREILTVIRKNNYQVFAEKTAVPKQRIQLLFTAKKM 299

CrtM_Saureus_Newman      284  YHRI- - - - - 287
EGBG_00588_Egall_EG2    286  IKTNRSENNAR 296
ECAG_00586_Ecass_EC10  300  LRQERWEG- - - 307
ECBG_00592_Ecass_EC20  300  LRQERWEG- - - 307
EGAG_00576_Ecass_EC30  300  LRQERWEG- - - 307

```
