# Supplementary figures and images for: Comparative Genomics of Enterococci: Variation in Enterococcus faecalis, Clade Structure in E. faecium, and Defining Characteristics of E. gallinarum and E. casseliflavus
Source: PubMed Central journal article supplement — mBio. 2012 Feb 21;3(1):e00318-11. doi: 10.1128/mBio.00318-11 (PMC3374389; doi:10.1128/mbio.00318-11), 2012-02-21

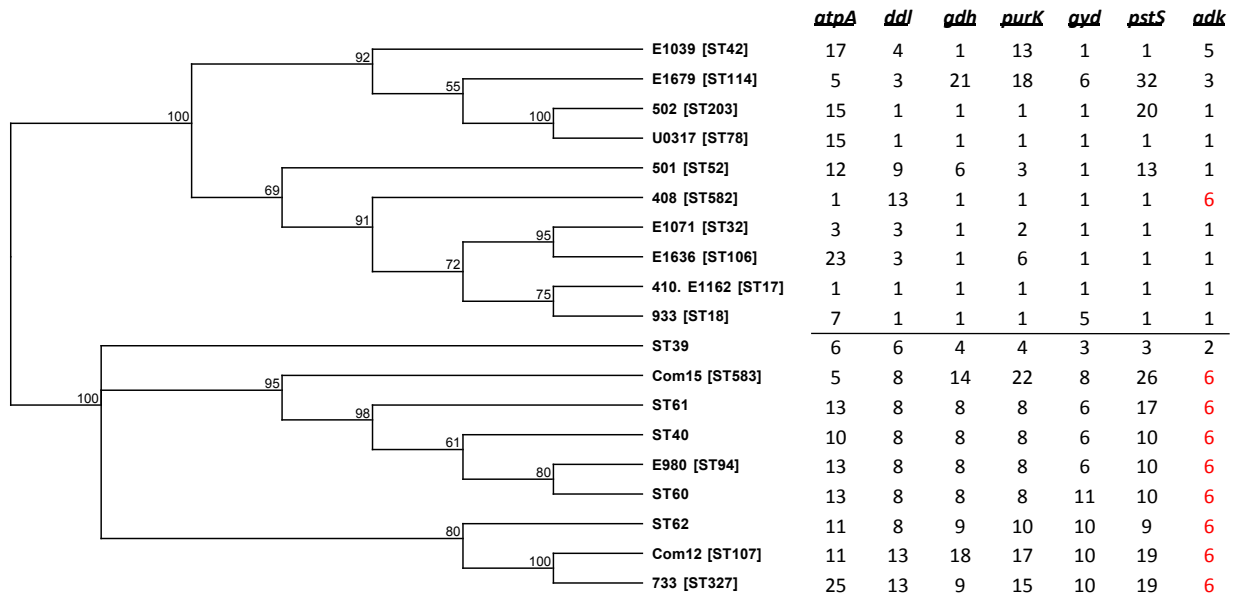

Supplement: mbo001121233sf01.pdf [file mbo001121233sf01.pdf]

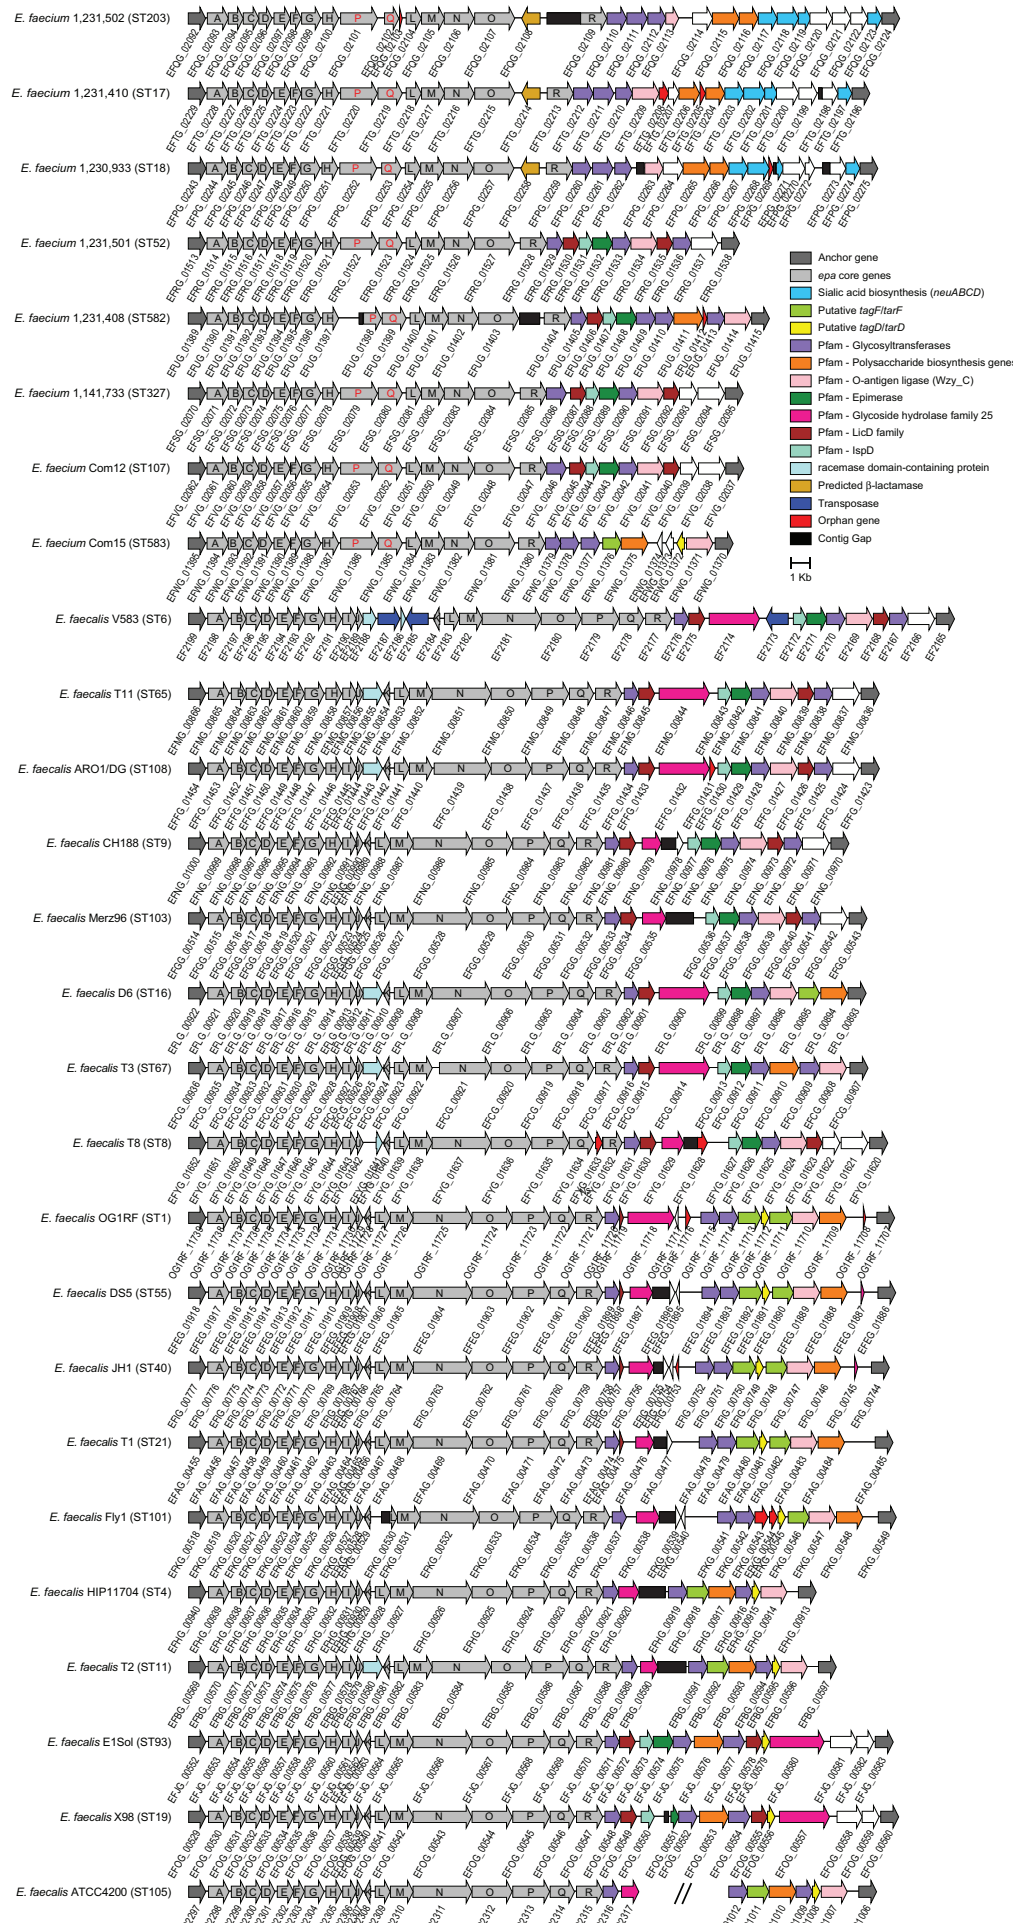

Supplement: mbo001121233sf03.pdf [file mbo001121233sf03.pdf]
